# Supplementary material for: Probing conformational hotspots for the recognition and intervention of protein complexes by lysine reactivity profiling
Source: Royal Society of Chemistry journal article supplement (doi:10.1039/d0sc05330a), 2020-11-23
Supplement: d0sc05330a1.pdf [file d0sc05330a1.pdf]

## **Probing Conformational Hotspots For The Recognition And Intervention Of Protein Complex By Lysine Reactivity Profiling**

Zheyi Liu,<sup>1\*</sup> Wenxiang Zhang,<sup>1,2\*</sup> Binwen Sun,<sup>1,3</sup> Yaolu Ma,<sup>1,3</sup> Min He,<sup>1,3</sup> Yuanjiang Pan,<sup>2</sup> Fangjun Wang,<sup>1,3†</sup>

<sup>1</sup>CAS Key Laboratory of Separation Sciences for Analytical Chemistry, Dalian Institute of Chemical Physics, Chinese Academy of Sciences, Dalian 116023, China.

<sup>2</sup>Department of Chemistry, Zhejiang University, Hangzhou 310027, China.

<sup>3</sup>University of Chinese Academy of Sciences, Beijing 100049, China.

†Corresponding Author. E-mail: wangfj@dicp.ac.cn

\*These authors contributed equally to this work.

\*Corresponding Author. E-mail: wangfj@dicp.ac.cn

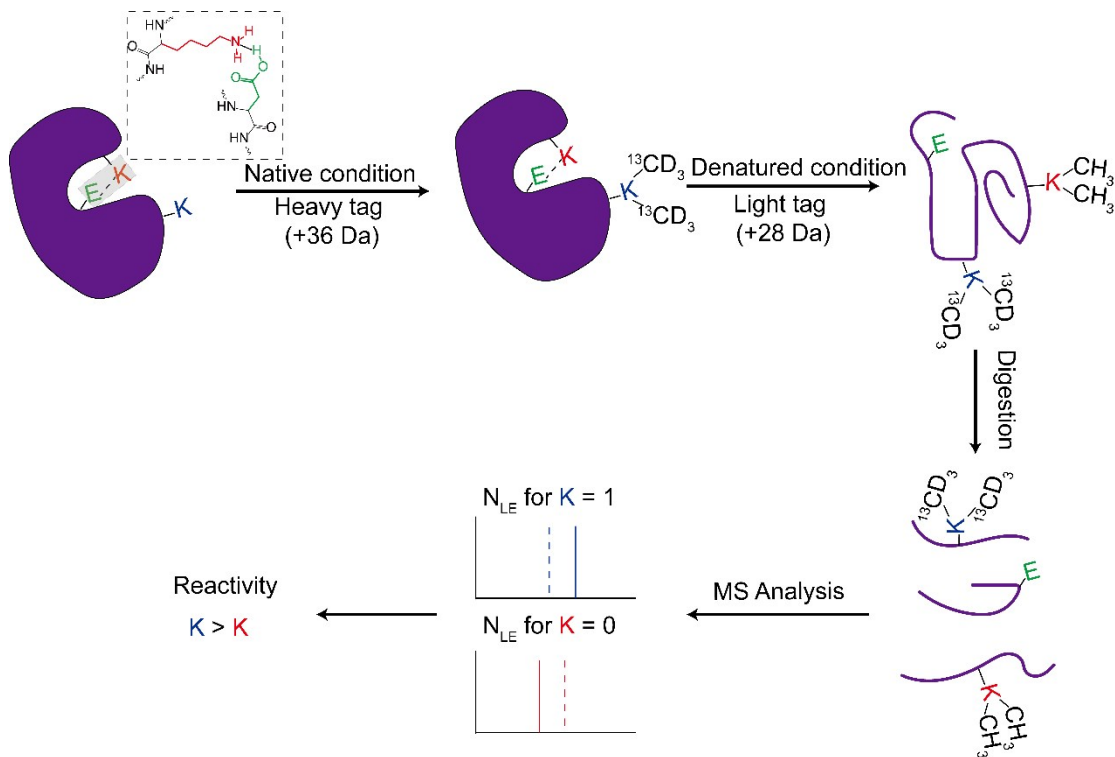

**Fig. S1.** The workflow of two-step isotope labeling-lysine reactivity profiling strategy. The first-step labeling is performed under native state with heavy isotope dimethyl tags. After denaturation, the second-step labeling is performed to completely labeled all of the lysine residues with light dimethyl tags.

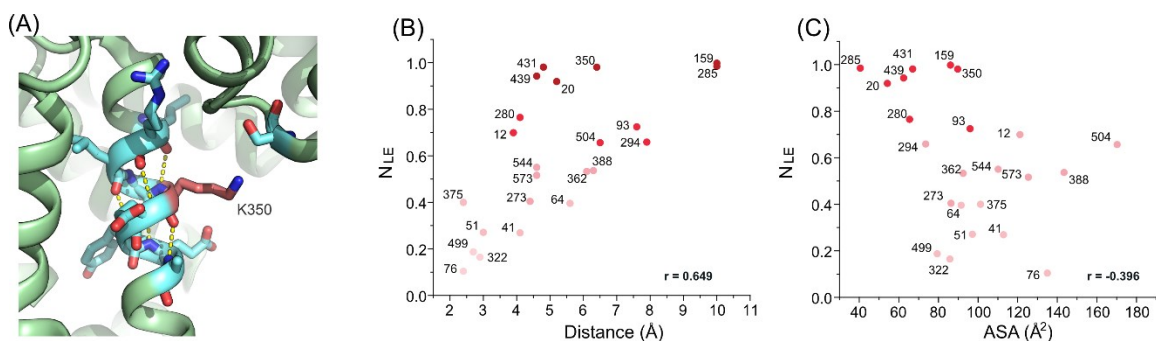

**Fig. S2.** Quantification of the relative lysine reactivities ( $N_{LE}$ ) of purified BSA under native aqueous solution by TILLRP strategy. (A) The microenvironment of Lys<sup>350</sup>; (B) The correlation between the lysine  $N_{LE}$  values and the distances between lysine residues and their proximal acidic residues (the correlation coefficient  $r$  is 0.649); (C) The correlation between the lysine  $N_{LE}$  values and the corresponding solvent-accessible surface areas (SASAs) (the correlation coefficient  $r$  is -0.396).

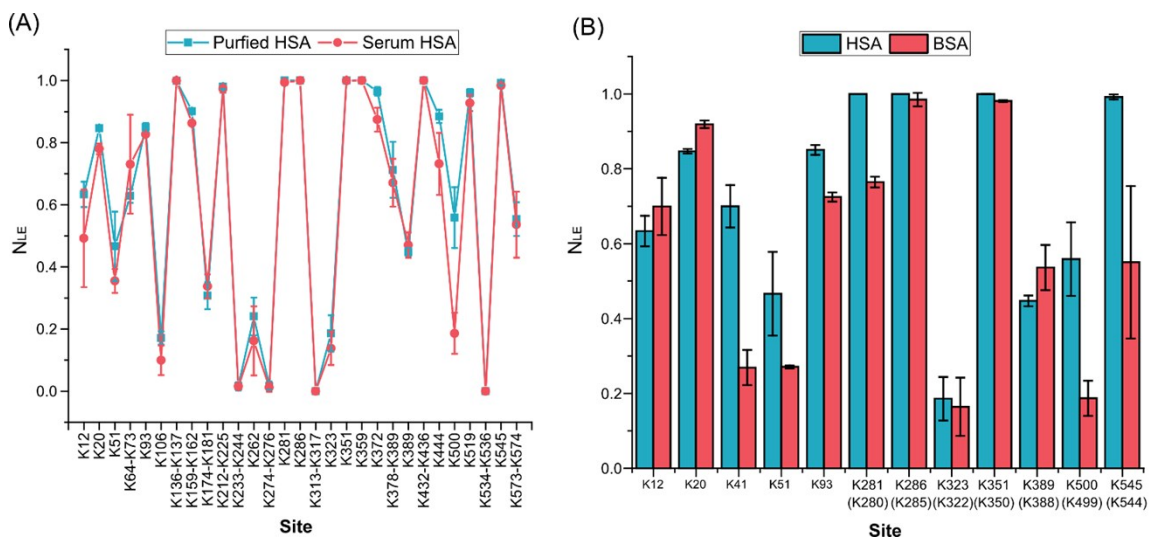

**Fig. S3.** Quantification of the relative lysine reactivity of HSA by TILLRP strategy. **(A)** The  $N_{LE}$  profiles of purified and serum HSA; **(B)** Comparison of the  $N_{LE}$  of conserved lysines in HSA and BSA, the lysines in brackets for BSA.

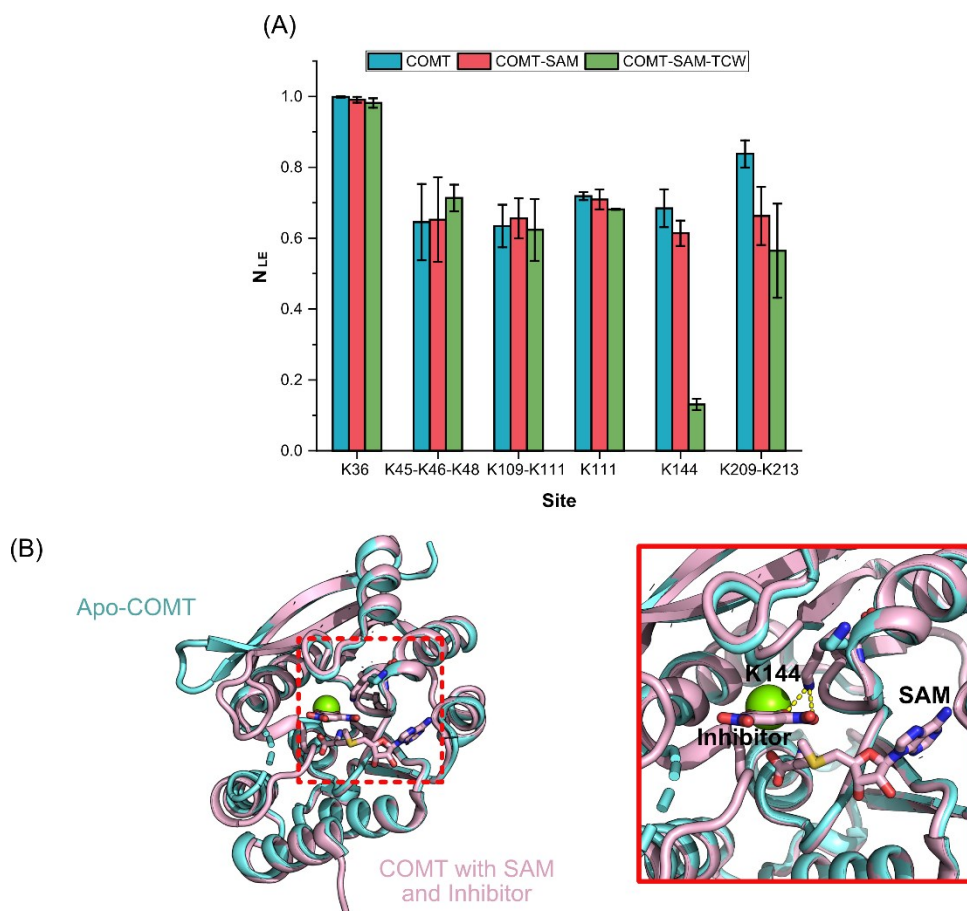

**Fig. S4.** Quantification of the lysine reactivity of COMT with/without ligand combination by TILLRP strategy. **(A)** comparison of the  $N_{LE}$  of lysine residues in COMT, COMT-SAM,

and COMT-SAM-TCW; **(B)** the microenvironments of Lys<sup>144</sup> in the crystal structure of apo-COMT (PDB: 4pyi) and COMT with ligands (PDB: 3bwy).

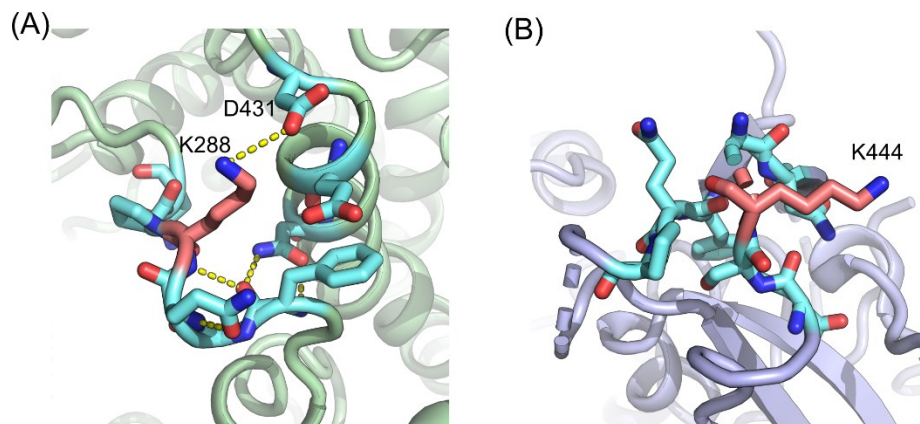

**Fig. S5.** The microenvironments of (A) ACE2 Lys<sup>288</sup> (PDB: 6m18) and (B) S1 Lys<sup>444</sup> (PDB: 6vxx). The salt bridge of lysine is shown as a yellow dashed line.

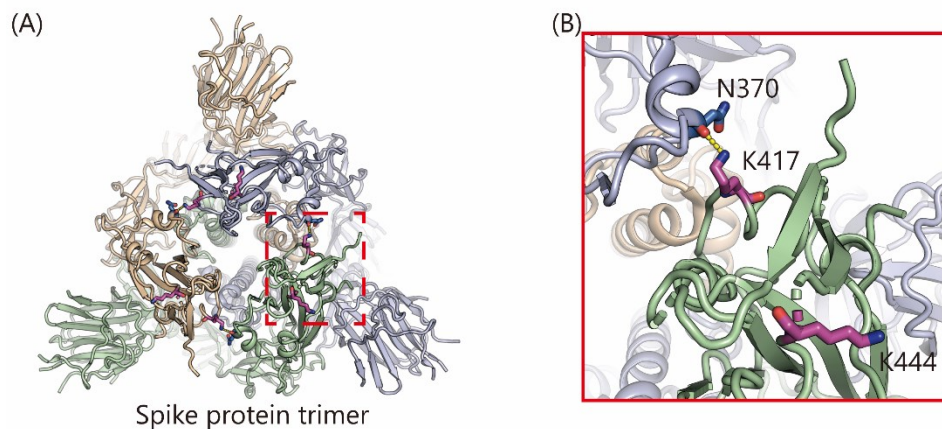

**Fig. S6.** The microenvironments of Lys<sup>417</sup> and Lys<sup>444</sup> at the closed trimer Spike glycoprotein conformation (PDB: 6vxx). The salt bridge of lysine is shown as a yellow dashed line.

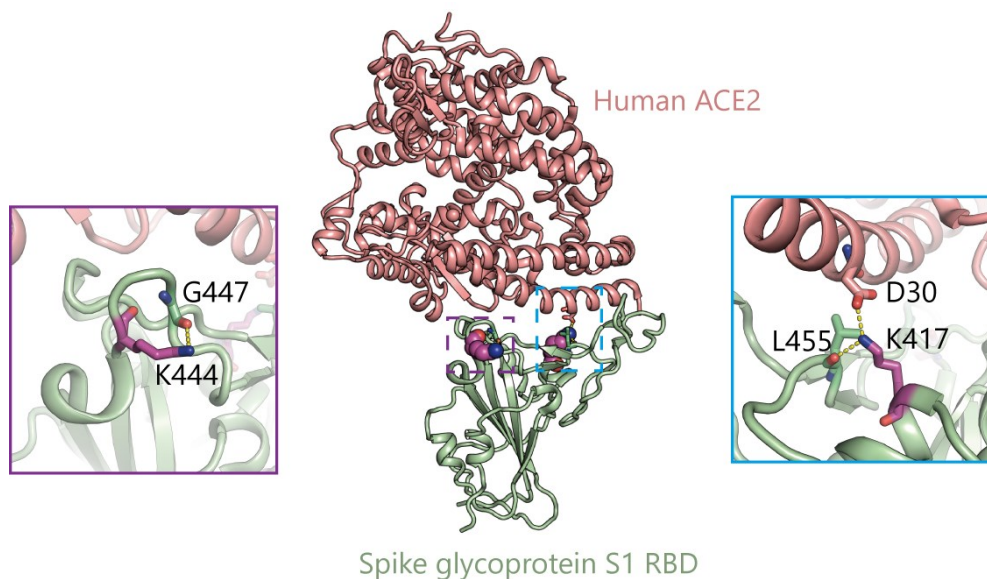

**Fig. S7.** The microenvironments of Lys<sup>417</sup> and Lys<sup>444</sup> in SARS-CoV-2 S1-ACE2 complex (PDB: 6lzg). The salt bridge of lysines are shown as yellow dashed lines.

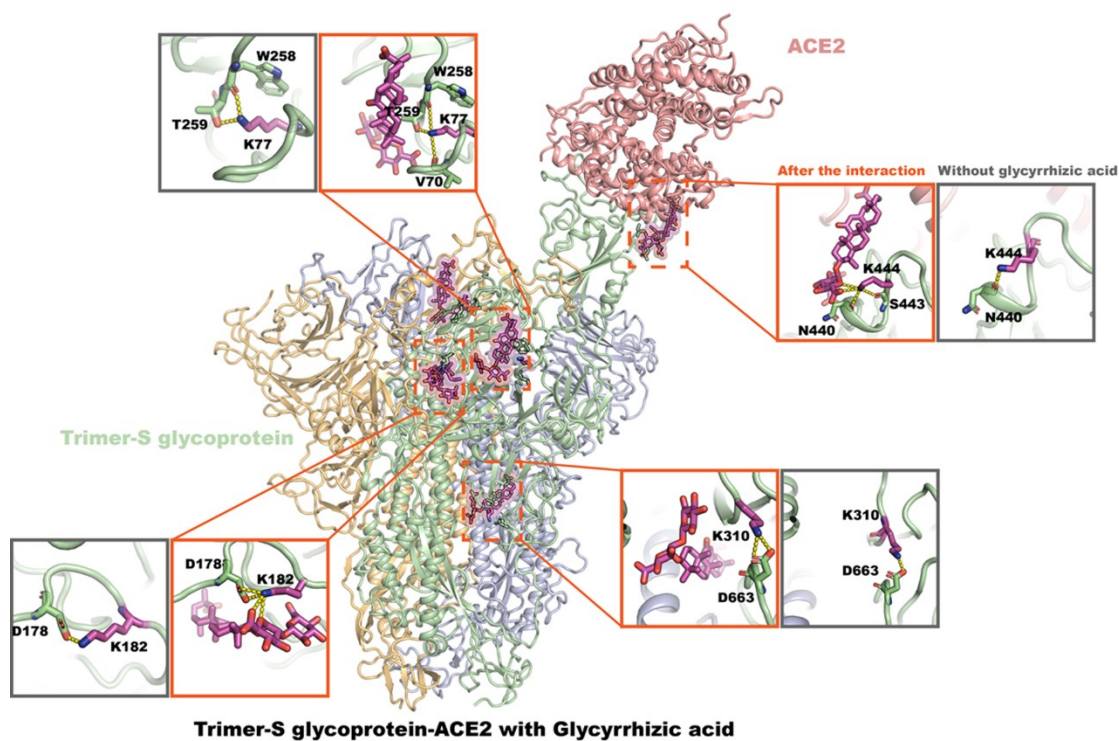

**Fig. S8.** Simulated docking conformation of the interactions of SARS-CoV-2 S1-ACE2 complex with glycyrrhizic acid. The gray and orange boxes represent the schematic diagram of lysine microenvironments before and after docking glycyrrhizic acid with S1-ACE2 complex. The salt bridges of lysines are shown as yellow dashed lines.



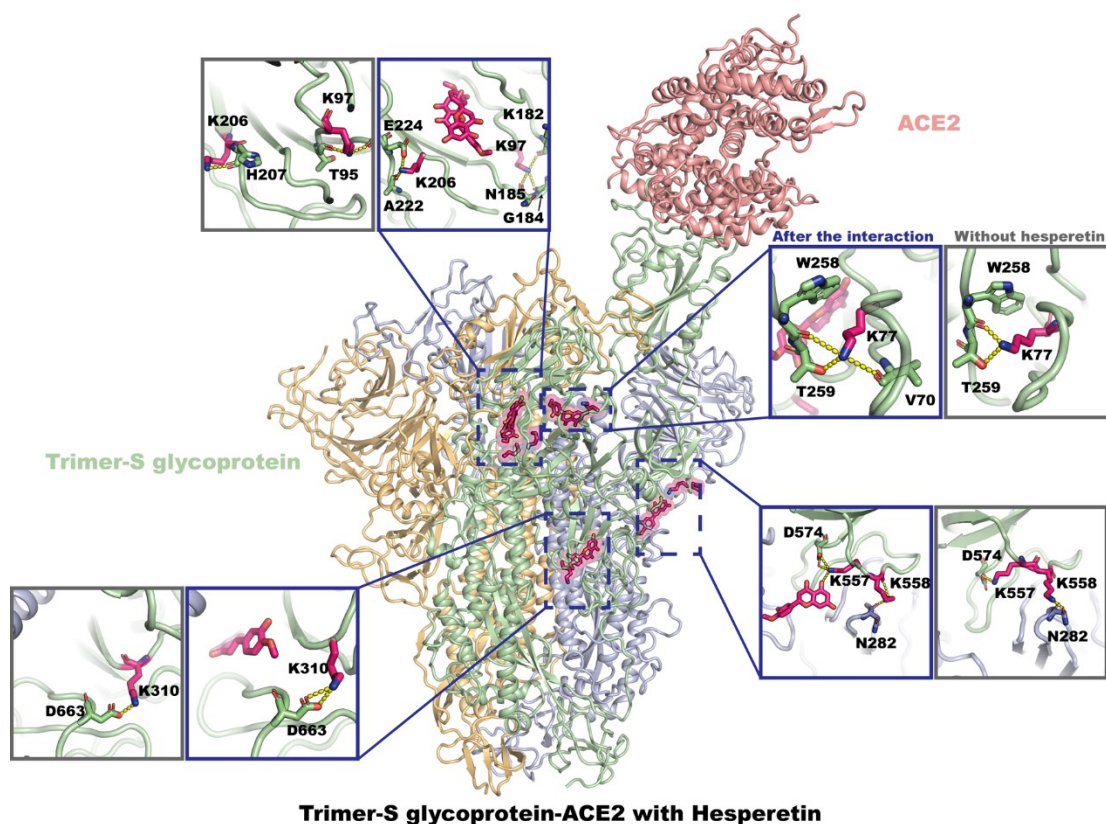

**Fig. S9.** Simulated docking conformation of the interactions of S1-ACE2 complex with hesperetin. The gray and blue boxes represent the schematic diagram of lysine microenvironments before and after docking hesperetin with S1-ACE2 complex. The salt bridges of lysines are shown as yellow dashed lines.

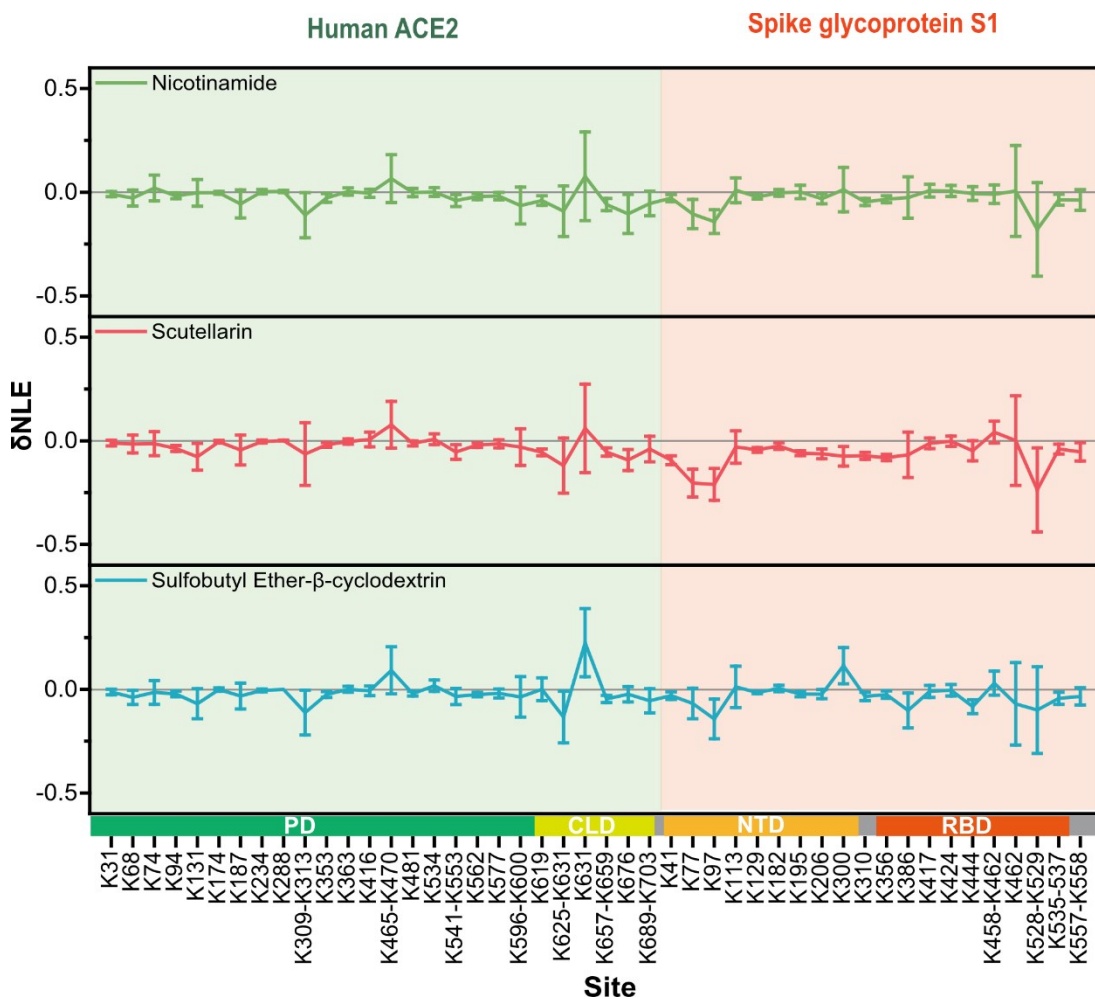

**Fig. S10.** The  $\delta N_{LE}$  of lysine residues in S1-ACE2 complexes modulated by the treatment of exogenous compounds nicotinamide, scutellarin, and sulfobutyl ether- $\beta$ -cyclodextrin.
